# Supplementary material for: The prenucleation clusters of ZnSe magic-size clusters mimic natural hydrolase
Source: Royal Society of Chemistry journal article supplement (doi:10.1039/d5cc07345f), 2026-01-01
Supplement: d5cc07345f1.pdf [file d5cc07345f1.pdf]

## **Supplementary information**

### **The prenucleation clusters of ZnSe magic size clusters mimicking natural hydrolase**

Yang Li,<sup>\*a†</sup> Yujie Yang,<sup>a†</sup> Yue Yang,<sup>a†</sup> Xieruoying Zhong,<sup>a</sup> Xianxiang Wang<sup>a</sup> and Li He<sup>\*a</sup>

<sup>a</sup> College of Science, Sichuan Agricultural University, Xin Kang Road, Yucheng District,  
Yaan, 625014, China

<sup>†</sup> These authors contribute equally

Email: [li\\_yang@sicau.edu.cn](mailto:li_yang@sicau.edu.cn) (Y. Li), [lihe@sicau.edu.cn](mailto:lihe@sicau.edu.cn) (L. He)

## Experimental section

### Materials

Zinc chloride ( $\text{ZnCl}_2$ , 98%) was purchased from Shanghai Acme Biochemical Co., Ltd. (Shanghai, China). 3-mercaptopropionic acid (MPA, 99%), 1-butylamine (BTA, AR), L-cystine (L-cys, 99%), 4-nitrophenyl acetate (p-NPA, 98%) were purchased from Shanghai Titan Scientific Co., Ltd. (Shanghai, China). Selenourea (98%) was obtained from Sigma-Aldrich (USA). Hydrogen peroxide ( $\text{H}_2\text{O}_2$ , 30%), copper(II) chloride dihydrate ( $\text{CuCl}_2 \cdot 2\text{H}_2\text{O}$ , AR), sodium hydroxide, acetic acid (HAc, AR), sodium acetate anhydrous (NaAc, AR), and sodium hydroxide (NaOH, AR), 3,3',5,5'-tetramethylbenzidine (TMB, 98%), tris(Hydroxymethyl)Aminomethane Hydrochloride (Tris-HCl, AR) were supplied by Chengdu Cologne Chemical Co., Ltd. (Chengdu, China). All the materials were applied without further purification.

### Characterization

X-ray photoelectron spectroscopy (XPS) analysis was obtained by an Escalab 250 Xi XPS system with Al K $\alpha$  source ( $h\nu = 1486.6 \text{ eV}$ ). X-ray diffraction (XRD) patterns were obtained using an X-ray diffractometer (DX-2700, Dandong, China) using Cu-K $\alpha$  radiation. Fourier transform infrared spectrometer (FT-IR) characterization was performed on a Nicolet iS20 (USA). UV-vis spectrophotometer (AOE, A390, China) and enzyme-labeled instrument (MD, SpectraMax190, USA) were used to collect the data of the catalytic performance.

### Synthesis of ZnSe prenucleation clusters

0.4 mmol of  $\text{ZnCl}_2$  (54.5 mg) and 0.8 mmol of MPA (70  $\mu\text{L}$ ) were mixed in 18 mL of water, and the pH was adjusted to 12 using 5 M NaOH. The volume was then brought to 19.5 mL by adding water. Under stirring, 0.5 mL of 200 mM SeU (0.1 mmol) was added, and the reaction proceeded at room temperature ( $\sim 25^\circ\text{C}$ ) for 5 hours. The product was purified by centrifugation and washing with ethanol. The final product was obtained by freeze-drying.

### CA mimetic activity assessment

The carbonic anhydrase-like activity of ZnSe was measured using p-NPA as the substrate by UV spectrophotometry. Specifically, 50  $\mu\text{L}$  of ZnSe solution (8 mg/mL) and 20  $\mu\text{L}$  of p-NPA solution (10 mM) were added to 930  $\mu\text{L}$  of Tris-HCl buffer (pH 10.0), resulting in a total reaction volume of 1 mL. After incubation at 25 °C for 30 minutes, the mixture was diluted 6-fold and scanned for absorbance between 300–500 nm using a UV spectrophotometer. A blank control was prepared by replacing the ZnSe solution with an equal volume of ultrapure water, containing only p-NPA.

### Determination of steady-state kinetic parameters

To determine the kinetic parameters of ZnSe-catalyzed hydrolysis of p-NPA, the initial reaction rate ( $V_o$ ) was measured at various substrate concentrations. Briefly, 20  $\mu\text{L}$  of p-NPA at different concentrations (0.02–5 mM) was mixed with 50  $\mu\text{L}$  of ZnSe solution (20 mg/mL) and 930  $\mu\text{L}$  of Tris-HCl buffer (pH 10.0). After 30 minutes of reaction at 25 °C, the mixture was diluted 6-fold, and the absorbance at 400 nm was measured to calculate  $V_o$  according to Equation (1):

$$V_o = [\Delta A_{400\text{ nm}} / (\epsilon L)] / t \quad (1)$$

where  $\epsilon$  is the molar extinction coefficient of the product p-nitrophenol (p-NP) ( $18,300\text{ M}^{-1}\cdot\text{cm}^{-1}$ ),  $L$  is the path length (1 cm), and  $t$  is the reaction time (30 minutes).

The  $V_o$  values obtained at different substrate concentrations  $[S]$  were fitted using the Michaelis–Menten equation (Equation 2) via nonlinear regression and the Lineweaver–Burk equation (Equation 3) via linear regression:

$$V_o = (V_{\text{max}} \times [S]) / (K_m + [S]) \quad (2)$$

$$1/V_o = (K_m / V_{\text{max}}) \times (1 / [S]) + 1 / V_{\text{max}} \quad (3)$$

From these fittings, the apparent maximum reaction rate ( $V_{\text{max}}$ ) and apparent Michaelis constant ( $K_m$ ) were determined.

### **Quantification of the concentration of Cu<sup>2+</sup>**

The introduction of Cu<sup>2+</sup> induces a concomitant decrease in the carbonic anhydrase (CA)-like activity of ZnSe cluster and an increase in the peroxidase-like activity of the resulting Cu<sub>2-x</sub>Se species. For dual-channel detection, two distinct protocols were employed. For the CA-like activity assay, 50 µL of ZnSe clusters and 50 µL of Cu<sup>2+</sup> (varying from 0.54 to 1.2 mM) were incubated in 1140 µL of Tris-HCl buffer (pH 9). Following the addition of 40 µL of p-NPA (10 mM) and a 30-minute reaction period, a 500 µL aliquot was diluted in 2.5 mL of H<sub>2</sub>O. The absorbance was measured at 400 nm. Simultaneously, the peroxidase-like activity was evaluated in a pH 4.0 NaAc-Hac buffer (840 µL). The reaction mixture contained 40 µL of ZnSe clusters, 40 µL of Cu<sup>2+</sup>, 40 µL of 30% H<sub>2</sub>O<sub>2</sub>, and 40 µL of TMB (5 mM). After a 30-minute incubation, the absorbance at 652 nm was recorded to quantify the Cu<sup>2+</sup> concentration.

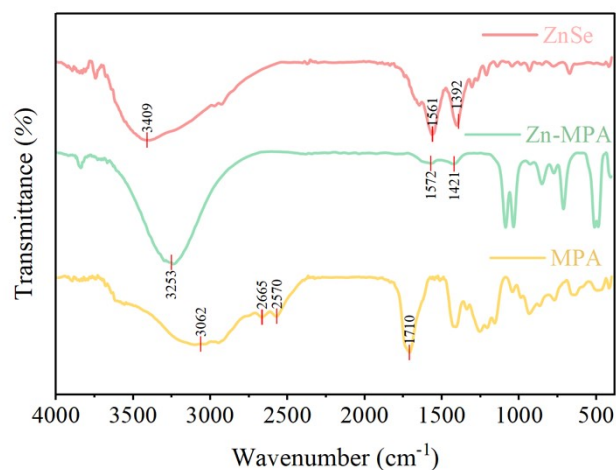

**Figure S1.** FT-IR spectra of ZnSe cluster, Zn-MPA complex, and MPA. Upon comparing the spectra of MPA and the Zn-MPA complex, the peak at  $1710\text{ cm}^{-1}$  attributed to the carboxyl C=O stretching vibration of MPA shifts to  $1561\text{ cm}^{-1}$  and  $1392\text{ cm}^{-1}$ , which can be ascribed to coordination between  $\text{Zn}^{+2}$  and the carboxylate group. Further comparison between the Zn-MPA complex and the ZnSe cluster reveals that the peaks at  $1421\text{ cm}^{-1}$  and  $1572\text{ cm}^{-1}$  further shift to  $1392\text{ cm}^{-1}$  and  $1561\text{ cm}^{-1}$ , respectively, suggesting the formation of ZnSe clusters. Additionally, the broad absorption bands around  $3410\text{ cm}^{-1}$  are associated with O–H stretching vibrations.

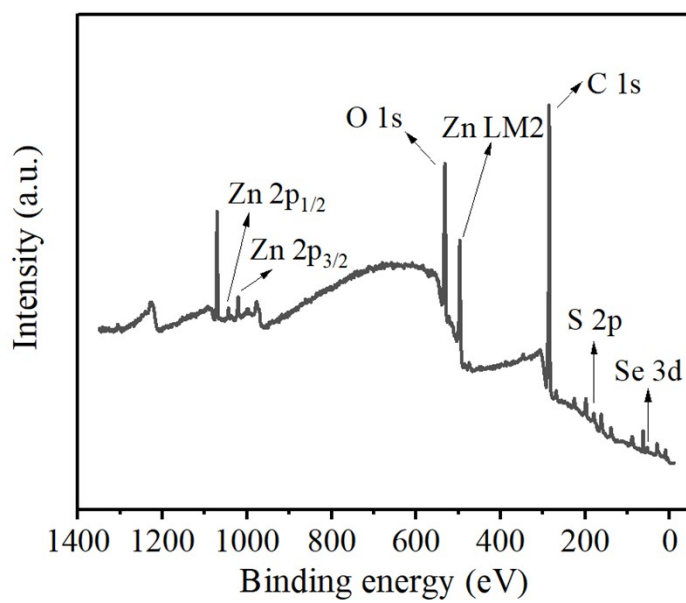

**Figure S2.** XPS survey spectra of ZnSe cluster.

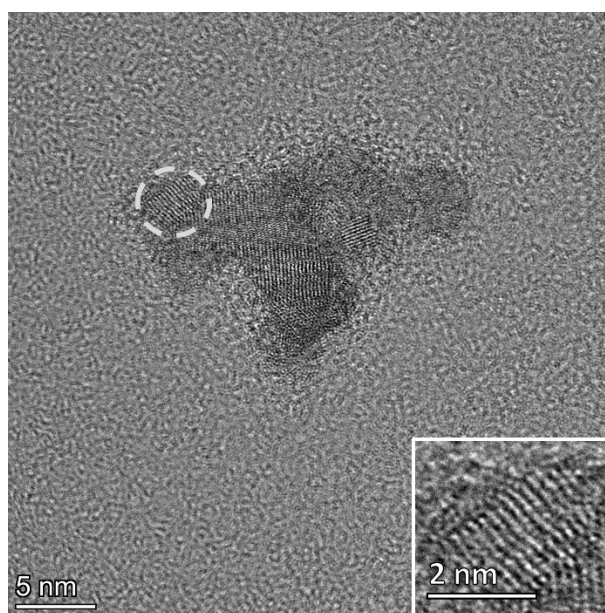

**Figure S3.** TEM spectra of ZnSe cluster.

**Table S1.** Catalytic activity parameters of ZnSe cluster and other CA-like catalysts.

| Material | $K_m$ (mM) | $V_{max}$ (mM/min) | Refs      |
|----------|------------|--------------------|-----------|
| ZnTaz-1  | 4.30       | 0.014              | 1         |
| ZIF-90   | 7.657      | 0.029              | 2         |
| DW-CAB   | 6.17       | 0.230              | 3         |
| ZC-HNPs  | 3.37       | 0.008              | 4         |
| ZnAC     | 4.071      | 0.220              | 5         |
| CA       | 154        | 102                | 6         |
| ZnSe     | 3.55       | 15.04              | This work |

## References

1. S. Liang, X.-L. Wu, M.-H. Zong and W.-Y. Lou, *Chemical Engineering Journal*, 2020, **398**, 125530.
2. C. Fan, Y. Tang, H. Wang, Y. Huang, F. Xu, Y. Yang, Y. Huang, W. Rong and Y. Lin, *Nanoscale*, 2022, **14**, 7985-7990.
3. L. Li, W. Xu, Z. Wu, W. Geng, S. Li, S. Sun, M. Wang, C. Cheng and C. Zhao, *Small*, 2024, **20**, 2307537.
4. B. Fan, Y. Zhang and Y. Lv, *Matter*, 2023, **6**, 4245-4260.
5. J. Liu, S. Sun, R. Lv, S. Lin, Y. A. Golubev, K. Wang, R. Cao and Y. Zeng, *Separation and Purification Technology*, 2025, **354**, 128979.
6. Ana M. Pablo-Sainz-Ezquerria, M. Rubio-Huertas, E. T. Tunca, P. W. Thulstrup and L. Hosta-Rigau, *Mater. Today Bio*, 2025, **35**, 102406.
